# Supplementary material
Source: PubMed Central journal article supplement (PMC10072989)
Supplement: BLT-21-100_Online_Supplementary_Content.pdf [file BLT-21-100_Online_Supplementary_Content.pdf]

**ONLINE SUPPLEMENTARY CONTENTS****Table SI - Anti-TBEV IgG antibody prevalence in blood donors vaccinated or not against TBEV, without excluding individuals with vaccination against or infection with other flaviviruses**

| Blood donors                       | Blood donors indicating vaccination | TBEV IgG ELISA positive | Prevalence | CI, lower limit | CI, upper limit | p       |
|------------------------------------|-------------------------------------|-------------------------|------------|-----------------|-----------------|---------|
| <b>Vaccinated against TBEV</b>     |                                     |                         |            |                 |                 |         |
| All                                | 2,293                               | 1,865                   | 81.3%      | 78.7%           | 83.8%           |         |
| Female                             | 802                                 | 676                     | 84.3%      | 79.9%           | 88.1%           | 0.0731  |
| Male                               | 1,491                               | 1,189                   | 79.8%      | 76.3%           | 82.9%           |         |
| Age <40                            | 794                                 | 679                     | 85.5%      | 81.3%           | 89.2%           | 0.0005  |
| Age ≥40 to <55                     | 915                                 | 741                     | 81.0%      | 76.7%           | 84.8%           |         |
| Age ≥55                            | 584                                 | 445                     | 76.2%      | 70.3%           | 81.4%           |         |
| Endemic region                     | 1,156                               | 967                     | 83.7%      | 80.0%           | 86.9%           | 0.0506  |
| Border region                      | 590                                 | 475                     | 80.5%      | 75.0%           | 85.3%           |         |
| Non-endemic region                 | 547                                 | 423                     | 77.3%      | 71.3%           | 82.6%           |         |
| <b>Not vaccinated against TBEV</b> |                                     |                         |            |                 |                 |         |
| All                                | 7,035                               | 416                     | 5.9%       | 5.2%            | 6.7%            |         |
| Female                             | 2,794                               | 109                     | 3.9%       | 2.9%            | 5.1%            | <0.0001 |
| Male                               | 4,241                               | 307                     | 7.2%       | 6.1%            | 8.5%            |         |
| Age <40                            | 1,880                               | 190                     | 10.1%      | 8.1%            | 12.4%           | <0.0001 |
| Age ≥40 to <55                     | 2,770                               | 127                     | 4.6%       | 3.5%            | 5.9%            |         |
| Age ≥55                            | 2,385                               | 99                      | 4.2%       | 3.0%            | 5.6%            |         |
| Endemic region                     | 1,926                               | 135                     | 7.0%       | 5.3%            | 9.0%            | 0.0155  |
| Border region                      | 1,993                               | 131                     | 6.6%       | 5.0%            | 8.5%            |         |
| Non-endemic region                 | 3,116                               | 150                     | 4.8%       | 3.7%            | 6.1%            |         |

**Table SII - Anti-TBEV IgG seropositivity rates of non-TBEV-vaccinated blood donors according to the sites of their blood donation, without excluding individuals with vaccination against or infection with other flaviviruses**

| Endemicity           | Canton                 | N. of blood donation sites | Blood donors indicating no TBEV vaccination | TBEV IgG ELISA positive | Prevalence |
|----------------------|------------------------|----------------------------|---------------------------------------------|-------------------------|------------|
| <b>Endemic</b>       | Aargau                 | 4                          | 93                                          | 6                       | 6.5%       |
|                      | Bern                   | 21                         | 939                                         | 72                      | 7.7%       |
|                      | Fribourg               | 5                          | 131                                         | 15                      | 11.5%      |
|                      | Luzern                 | 11                         | 415                                         | 20                      | 4.8%       |
|                      | Nidwalden              | 3                          | 149                                         | 12                      | 8.1%       |
|                      | Obwalden               | 1                          | 32                                          | 2                       | 6.3%       |
|                      | St. Gallen             | 1                          | 34                                          | 1                       | 2.9%       |
|                      | Solothurn              | 1                          | 18                                          | 1                       | 5.6%       |
|                      | Uri                    | 1                          | 17                                          | 1                       | 5.9%       |
|                      | Vaud                   | 5                          | 98                                          | 5                       | 5.1%       |
| <b>Border region</b> | Appenzell Ausserrhoden | 1                          | 32                                          | 1                       | 3.1%       |
|                      | Bern                   | 2                          | 315                                         | 11                      | 3.5%       |
|                      | Basel Land             | 1                          | 27                                          | 3                       | 11.1%      |
|                      | Basel Stadt            | 1                          | 725                                         | 58                      | 8.0%       |
|                      | St. Gallen             | 4                          | 75                                          | 5                       | 6.7%       |
|                      | Thurgau                | 1                          | 22                                          | 3                       | 13.6%      |
|                      | Vaud                   | 8                          | 797                                         | 50                      | 6.3%       |
| <b>Non-endemic</b>   | Appenzell Innerhoden   | 1                          | 43                                          | 5                       | 11.6%      |
|                      | Appenzell Ausserrhoden | 2                          | 48                                          | 2                       | 4.2%       |
|                      | Genève                 | 1                          | 1                                           | 0                       | 0.0%       |
|                      | Graubünden             | 1                          | 20                                          | 2                       | 10.0%      |
|                      | St. Gallen             | 7                          | 555                                         | 42                      | 7.6%       |
|                      | Ticino                 | 17                         | 948                                         | 43                      | 4.5%       |
|                      | Vaud                   | 24                         | 1,501                                       | 56                      | 3.7%       |

Seroprevalence rates in non-endemic (0.0-11.6%) and border regions (3.1-13.6%) are as high as those in endemic regions (2.9-11.5%). p-values were calculated using Chi square test with Bonferroni correction.
